# Supplementary material for: Late Local Recurrence and Metastasis in Soft Tissue Sarcoma of the Extremities and Trunk Wall: Better Outcome After Treatment of Late Events Compared with Early
Source: Springer Nature journal article supplement (doi:10.1245/s10434-021-09942-8), 2021-04-16
Supplement: MOESM1 [file 19076622]

Supplementary table 1: Cox proportional hazard model analysis of prognostic factors for early local recurrence of soft tissue sarcoma

|                                       | Patients | Local recurrence | %    | Univariable analysis |                   |                   |                      | Multivariable analysis |                  |                   |                      |
|---------------------------------------|----------|------------------|------|----------------------|-------------------|-------------------|----------------------|------------------------|------------------|-------------------|----------------------|
|                                       |          |                  |      | HR                   | 95 % CI           | p-value           | p-value <sup>b</sup> | HR                     | 95 % CI          | p-value           | p-value <sup>b</sup> |
| <b>Age</b>                            |          |                  |      |                      |                   |                   |                      |                        |                  |                   |                      |
| < 64 years                            | 275      | 40               | 15%  | <i>Reference</i>     |                   |                   |                      | <i>Reference</i>       |                  |                   |                      |
| ≥ 64 years                            | 402      | 89               | 22%  | <b>1.8</b>           | <b>1.2 - 2.6</b>  | <b>0.002</b>      | <b>0.002</b>         | <b>1.6</b>             | <b>1.0 - 2.5</b> | <b>0.047</b>      | <b>0.047</b>         |
| <b>Sex</b>                            |          |                  |      |                      |                   |                   |                      |                        |                  |                   |                      |
| Male                                  | 369      | 67               | 18%  | <i>Reference</i>     |                   |                   |                      |                        |                  |                   |                      |
| Female                                | 308      | 62               | 20%  | 1.2                  | 0.8 - 1.7         | 0.36              | 0.36                 |                        |                  |                   |                      |
| <b>Depth</b>                          |          |                  |      |                      |                   |                   |                      |                        |                  |                   |                      |
| Superficial                           | 267      | 54               | 20%  | <i>Reference</i>     |                   |                   |                      |                        |                  |                   |                      |
| Deep                                  | 402      | 74               | 18%  | 0.9                  | 0.7 - 1.3         | 0.77              | 0.77                 |                        |                  |                   |                      |
| Not available                         | 8        | 1                | 13%  |                      |                   |                   |                      |                        |                  |                   |                      |
| <b>Location</b>                       |          |                  |      |                      |                   |                   |                      |                        |                  |                   |                      |
| Lower extremity                       | 422      | 72               | 17%  | <i>Reference</i>     |                   |                   |                      | <i>Reference</i>       |                  |                   |                      |
| Upper extremity                       | 164      | 30               | 18%  | 1.1                  | 0.7 - 1.7         | 0.7               |                      | 0.8                    | 0.5 - 1.3        | 0.42              |                      |
| Trunk                                 | 91       | 27               | 30%  | <b>1.9</b>           | <b>1.2 - 3.0</b>  | <b>0.005</b>      | <b>0.03</b>          | <b>1.8</b>             | <b>1.1 - 2.9</b> | <b>0.02</b>       | <b>0.03</b>          |
| <b>Size</b>                           |          |                  |      |                      |                   |                   |                      |                        |                  |                   |                      |
| < 5 cm                                | 194      | 35               | 18%  | <i>Reference</i>     |                   |                   |                      |                        |                  |                   |                      |
| ≥ 5 cm                                | 475      | 91               | 19%  | 1.2                  | 0.8 - 1.7         | 0.45              | 0.44                 |                        |                  |                   |                      |
| Not available                         | 8        | 3                |      |                      |                   |                   |                      |                        |                  |                   |                      |
| < 8 cm                                | 373      | 66               | 18%  | <i>Reference</i>     |                   |                   |                      |                        |                  |                   |                      |
| ≥ 8 cm                                | 296      | 60               | 20%  | 1.3                  | 0.9 - 1.8         | 0.16              | 0.16                 |                        |                  |                   |                      |
| Not available                         | 8        | 3                |      |                      |                   |                   |                      |                        |                  |                   |                      |
| <b>Malignancy grade</b>               |          |                  |      |                      |                   |                   |                      |                        |                  |                   |                      |
| Low-grade                             | 100      | 12               | 12%  | <i>Reference</i>     |                   |                   |                      | <i>Reference</i>       |                  |                   |                      |
| High-grade                            | 558      | 112              | 20%  | <b>1.9</b>           | <b>1.04 - 3.4</b> | <b>0.04</b>       | <b>0.02</b>          | 1.2                    | 0.6 - 2.5        | 0.64              | 0.63                 |
| Not available                         | 19       | 5                |      |                      |                   |                   |                      |                        |                  |                   |                      |
| <b>Vascular invasion</b>              |          |                  |      |                      |                   |                   |                      |                        |                  |                   |                      |
| No                                    | 464      | 81               | 17%  | <i>Reference</i>     |                   |                   |                      | <i>Reference</i>       |                  |                   |                      |
| Yes                                   | 113      | 29               | 26%  | <b>1.8</b>           | <b>1.2 - 2.7</b>  | <b>0.008</b>      | <b>0.01</b>          | 1.5                    | 0.96 - 2.3       | 0.07              | 0.07                 |
| Not available                         | 100      | 19               |      |                      |                   |                   |                      |                        |                  |                   |                      |
| <b>Necrosis</b>                       |          |                  |      |                      |                   |                   |                      |                        |                  |                   |                      |
| No                                    | 226      | 36               | 16%  | <i>Reference</i>     |                   |                   |                      |                        |                  |                   |                      |
| Yes                                   | 368      | 72               | 20%  | 1.4                  | 0.9 - 2.0         | 0.14              | 0.13                 |                        |                  |                   |                      |
| Not available                         | 83       | 21               |      |                      |                   |                   |                      |                        |                  |                   |                      |
| <b>Growth pattern</b>                 |          |                  |      |                      |                   |                   |                      |                        |                  |                   |                      |
| Pushing                               | 26       | 1                | 3.8% | <i>Reference</i>     |                   |                   |                      |                        |                  |                   |                      |
| Infiltrative                          | 174      | 37               | 21%  | 6.5                  | 0.9 - 47.2        | 0.07              | <b>0.01</b>          |                        |                  |                   |                      |
| Not available                         | 477      | 91               |      |                      |                   |                   |                      |                        |                  |                   |                      |
| <b>Histology</b>                      |          |                  |      |                      |                   |                   |                      |                        |                  |                   |                      |
| UPS                                   | 165      | 43               | 26%  | <i>Reference</i>     |                   |                   |                      | <i>Reference</i>       |                  |                   |                      |
| Leiomyosarcoma                        | 146      | 23               | 16%  | <b>0.5</b>           | <b>0.3 - 0.9</b>  | <b>0.01</b>       |                      | <b>0.5</b>             | <b>0.3 - 0.8</b> | <b>0.006</b>      |                      |
| Liposarcoma                           | 70       | 7                | 10%  | <b>0.3</b>           | <b>0.1 - 0.7</b>  | <b>0.004</b>      |                      | <b>0.3</b>             | <b>0.1 - 0.7</b> | <b>0.006</b>      |                      |
| MPNST                                 | 30       | 3                | 10%  | 0.3                  | 0.1 - 1.1         | 0.07              |                      | 0.5                    | 0.1 - 1.6        | 0.24              |                      |
| Myxofibrosarcoma                      | 112      | 21               | 19%  | 0.6                  | 0.4 - 1.1         | 0.09              |                      | 0.6                    | 0.4 - 1.1        | 0.12              |                      |
| Synovial sarcoma                      | 43       | 10               | 23%  | 0.7                  | 0.4 - 1.1         | 0.34              |                      | 0.9                    | 0.4 - 1.9        | 0.73              |                      |
| Other                                 | 111      | 22               | 20%  | 0.7                  | 0.4 - 1.1         | 0.14              | 0.02                 | 0.8                    | 0.4 - 1.3        | 0.26              | <b>0.04</b>          |
| <b>Surgical procedure<sup>a</sup></b> |          |                  |      |                      |                   |                   |                      |                        |                  |                   |                      |
| Local excision                        | 561      | 101              | 18%  | <i>Reference</i>     |                   |                   |                      |                        |                  |                   |                      |
| Amputation                            | 25       | 1                | 4.0% | 0.2                  | 0.05 - 1.6        | 0.13              | 0.047                |                        |                  |                   |                      |
| <b>Final surgical margin</b>          |          |                  |      |                      |                   |                   |                      |                        |                  |                   |                      |
| R0 Wide                               | 377      | 41               | 11%  | <i>Reference</i>     |                   |                   |                      | <i>Reference</i>       |                  |                   |                      |
| R0 Marginal                           | 250      | 66               | 26%  | <b>2.9</b>           | <b>1.9 - 4.2</b>  | <b>&lt; 0.001</b> |                      | <b>2.9</b>             | <b>1.9 - 4.4</b> | <b>&lt; 0.001</b> |                      |
| R1                                    | 49       | 22               | 45%  | <b>5.6</b>           | <b>3.3 - 9.4</b>  | <b>&lt; 0.001</b> | <b>&lt; 0.001</b>    | <b>4.2</b>             | <b>2.2 - 7.8</b> | <b>&lt; 0.001</b> | <b>&lt; 0.001</b>    |
| Not available                         | 1        | 0                |      |                      |                   |                   |                      |                        |                  |                   |                      |
| <b>Radiotherapy</b>                   |          |                  |      |                      |                   |                   |                      |                        |                  |                   |                      |
| No                                    | 416      | 87               | 21%  | <i>Reference</i>     |                   |                   |                      |                        |                  |                   |                      |
| Yes                                   | 261      | 42               | 16%  | 0.7                  | 0.5 - 1.1         | 0.11              | 0.1                  |                        |                  |                   |                      |
| <b>Chemotherapy</b>                   |          |                  |      |                      |                   |                   |                      |                        |                  |                   |                      |
| No                                    | 586      | 108              | 18%  | <i>Reference</i>     |                   |                   |                      |                        |                  |                   |                      |
| Yes                                   | 91       | 21               | 23%  | 1.2                  | 0.7 - 1.8         | 0.54              | 0.55                 |                        |                  |                   |                      |

Abbreviations: UPS, undifferentiated pleomorphic sarcoma; MPNST, malignant peripheral nerve sheath tumor

<sup>a</sup> Not applicable to the 91 patients with tumours located to the trunk wall.

<sup>b</sup> Overall likelihood ratio test.

Supplementary table 2: Cox proportional hazard model analysis of prognostic factors for early metastasis of soft tissue sarcoma

|                                       | Univariable analysis |            |      |            |                   |                   | Multivariable analysis |            |                  |                   |                      |
|---------------------------------------|----------------------|------------|------|------------|-------------------|-------------------|------------------------|------------|------------------|-------------------|----------------------|
|                                       | Patients             | Metastasis | %    | HR         | 95 % CI           | p-value           | p-value <sup>b</sup>   | HR         | 95 % CI          | p-value           | p-value <sup>b</sup> |
| <b>Age</b>                            |                      |            |      |            |                   |                   |                        |            |                  |                   |                      |
| < 64 years                            | 275                  | 75         | 27%  | Reference  |                   |                   |                        |            |                  |                   |                      |
| ≥ 64 years                            | 402                  | 115        | 29%  | 1.2        | 0.9 - 1.6         | 0.18              | 0.18                   |            |                  |                   |                      |
| <b>Sex</b>                            |                      |            |      |            |                   |                   |                        |            |                  |                   |                      |
| Male                                  | 369                  | 105        | 28%  | Reference  |                   |                   |                        |            |                  |                   |                      |
| Female                                | 308                  | 85         | 28%  | 1.0        | 0.8 - 1.4         | 0.87              | 0.87                   |            |                  |                   |                      |
| <b>Depth</b>                          |                      |            |      |            |                   |                   |                        |            |                  |                   |                      |
| Superficial                           | 267                  | 50         | 19%  | Reference  |                   |                   |                        | Reference  |                  |                   |                      |
| Deep                                  | 402                  | 139        | 35%  | <b>2.1</b> | <b>1.5 - 2.9</b>  | <b>&lt; 0.001</b> | <b>&lt; 0.001</b>      | 1.4        | 0.9 - 2.1        | 0.09              | 0.09                 |
| Not available                         | 8                    | 1          |      |            |                   |                   |                        |            |                  |                   |                      |
| <b>Location</b>                       |                      |            |      |            |                   |                   |                        |            |                  |                   |                      |
| Lower extremity                       | 422                  | 127        | 30%  | Reference  |                   |                   |                        | Reference  |                  |                   |                      |
| Upper extremity                       | 164                  | 34         | 21%  | <b>0.7</b> | <b>0.6 - 0.97</b> | <b>0.03</b>       |                        | 0.8        | 0.5 - 1.2        | 0.2               |                      |
| Trunk                                 | 91                   | 29         | 32%  | 1.1        | 0.7 - 1.6         | 0.72              | 0.06                   | 0.8        | 0.5 - 1.3        | 0.31              | 0.31                 |
| <b>Size</b>                           |                      |            |      |            |                   |                   |                        |            |                  |                   |                      |
| < 5 cm                                | 194                  | 20         | 10%  | Reference  |                   |                   |                        | Reference  |                  |                   |                      |
| ≥ 5 cm                                | 475                  | 167        | 35%  | <b>4.3</b> | <b>2.7 - 6.8</b>  | <b>&lt; 0.001</b> | <b>&lt; 0.001</b>      | <b>2.1</b> | <b>1.2 - 3.6</b> | <b>0.006</b>      | <b>0.006</b>         |
| Not available                         | 8                    | 3          |      |            |                   |                   |                        |            |                  |                   |                      |
| < 8 cm                                | 373                  | 66         | 18%  | Reference  |                   |                   |                        | Reference  |                  |                   |                      |
| ≥ 8 cm                                | 296                  | 121        | 41%  | <b>2.9</b> | <b>2.1 - 3.9</b>  | <b>&lt; 0.001</b> | <b>&lt; 0.001</b>      | <b>1.7</b> | <b>1.1 - 2.5</b> | <b>0.009</b>      | <b>0.009</b>         |
| Not available                         | 8                    | 3          |      |            |                   |                   |                        |            |                  |                   |                      |
| <b>Malignancy grade</b>               |                      |            |      |            |                   |                   |                        |            |                  |                   |                      |
| Low-grade                             | 100                  | 6          | 6.0% | Reference  |                   |                   |                        | Reference  |                  |                   |                      |
| High-grade                            | 558                  | 183        | 33%  | <b>6.7</b> | <b>3.0 - 15.2</b> | <b>&lt; 0.001</b> | <b>&lt; 0.001</b>      | <b>3.2</b> | <b>1.2 - 8.3</b> | <b>0.02</b>       | <b>0.02</b>          |
| Not available                         | 19                   | 1          |      |            |                   |                   |                        |            |                  |                   |                      |
| <b>Vascular invasion</b>              |                      |            |      |            |                   |                   |                        |            |                  |                   |                      |
| No                                    | 464                  | 108        | 23%  | Reference  |                   |                   |                        | Reference  |                  |                   |                      |
| Yes                                   | 113                  | 64         | 57%  | <b>3.6</b> | <b>2.6 - 4.9</b>  | <b>&lt; 0.001</b> | <b>&lt; 0.001</b>      | <b>2.4</b> | <b>1.7 - 3.3</b> | <b>&lt; 0.001</b> | <b>&lt; 0.001</b>    |
| Not available                         | 100                  | 18         |      |            |                   |                   |                        |            |                  |                   |                      |
| <b>Necrosis</b>                       |                      |            |      |            |                   |                   |                        |            |                  |                   |                      |
| No                                    | 226                  | 30         | 13%  | Reference  |                   |                   |                        | Reference  |                  |                   |                      |
| Yes                                   | 368                  | 143        | 39%  | <b>3.7</b> | <b>2.5 - 5.5</b>  | <b>&lt; 0.001</b> | <b>&lt; 0.001</b>      | <b>1.8</b> | <b>1.1 - 2.8</b> | <b>0.02</b>       | <b>0.02</b>          |
| Not available                         | 83                   | 17         |      |            |                   |                   |                        |            |                  |                   |                      |
| <b>Growth pattern</b>                 |                      |            |      |            |                   |                   |                        |            |                  |                   |                      |
| Pushing                               | 26                   | 4          | 15%  | Reference  |                   |                   |                        |            |                  |                   |                      |
| Infiltrative                          | 174                  | 54         | 31%  | 2.3        | 0.8 - 6.4         | 0.1               | 0.07                   |            |                  |                   |                      |
| Not available                         | 477                  | 132        |      |            |                   |                   |                        |            |                  |                   |                      |
| <b>Histology</b>                      |                      |            |      |            |                   |                   |                        |            |                  |                   |                      |
| UPS                                   | 165                  | 50         | 30%  | Reference  |                   |                   |                        | Reference  |                  |                   |                      |
| Leiomyosarcoma                        | 146                  | 46         | 32%  | 1.0        | 0.7 - 1.5         | 0.97              |                        | 1.1        | 0.7 - 1.7        | 0.64              |                      |
| Liposarcoma                           | 70                   | 13         | 19%  | <b>0.5</b> | <b>0.3 - 0.9</b>  | <b>0.03</b>       |                        | 0.5        | 0.3 - 1.1        | 0.09              |                      |
| MPNST                                 | 30                   | 10         | 33%  | 1.1        | 0.5 - 2.1         | 0.86              |                        | 1.8        | 0.9 - 3.6        | 0.1               |                      |
| Myxofibrosarcoma                      | 112                  | 21         | 19%  | <b>0.6</b> | <b>0.3 - 0.9</b>  | <b>0.03</b>       |                        | 0.6        | 0.3 - 1.0        | 0.06              |                      |
| Synovial sarcoma                      | 43                   | 21         | 49%  | 1.5        | 0.9 - 2.5         | 0.13              |                        | 1.2        | 0.7 - 2.2        | 0.52              |                      |
| Other                                 | 111                  | 29         | 26%  | 0.8        | 0.5 - 1.3         | 0.38              | <b>0.01</b>            | 1.2        | 0.7 - 2.1        | 0.6               | <b>0.04</b>          |
| <b>Surgical procedure<sup>a</sup></b> |                      |            |      |            |                   |                   |                        |            |                  |                   |                      |
| Local excision                        | 561                  | 150        | 27%  | Reference  |                   |                   |                        | Reference  |                  |                   |                      |
| Amputation                            | 25                   | 11         | 44%  | <b>1.9</b> | <b>1.05 - 3.5</b> | <b>0.04</b>       | 0.06                   | 1.7        | 0.8 - 3.5        | 0.19              | 0.18                 |
| <b>Final surgical margin</b>          |                      |            |      |            |                   |                   |                        |            |                  |                   |                      |
| Wide                                  | 377                  | 93         | 25%  | Reference  |                   |                   |                        | Reference  |                  |                   |                      |
| Marginal                              | 250                  | 78         | 31%  | <b>1.4</b> | <b>1.04 - 1.9</b> | <b>0.03</b>       |                        | <b>1.5</b> | <b>1.0 - 2.3</b> | <b>0.04</b>       |                      |
| Intralesional                         | 49                   | 19         | 39%  | <b>1.9</b> | <b>1.2 - 3.1</b>  | <b>0.01</b>       | <b>0.01</b>            | 1.7        | 0.8 - 3.4        | 0.16              | <b>0.09</b>          |
| Not available                         | 1                    | 0          |      |            |                   |                   |                        |            |                  |                   |                      |
| <b>Radiotherapy</b>                   |                      |            |      |            |                   |                   |                        |            |                  |                   |                      |
| No                                    | 416                  | 90         | 22%  | Reference  |                   |                   |                        | Reference  |                  |                   |                      |
| Yes                                   | 261                  | 100        | 38%  | <b>1.9</b> | <b>1.4 - 2.6</b>  | <b>&lt; 0.001</b> | <b>&lt; 0.001</b>      | 1.0        | 0.7 - 1.5        | 0.95              | 0.95                 |
| <b>Chemotherapy</b>                   |                      |            |      |            |                   |                   |                        |            |                  |                   |                      |
| No                                    | 586                  | 154        | 26%  | Reference  |                   |                   |                        | Reference  |                  |                   |                      |
| Yes                                   | 91                   | 36         | 40%  | <b>1.5</b> | <b>1.0 - 2.1</b>  | <b>0.03</b>       | <b>0.04</b>            | <b>0.6</b> | <b>0.4 - 1.0</b> | <b>0.046</b>      | 0.046                |

Abbreviations: UPS, undifferentiated pleomorphic sarcoma; MPNST, malignant peripheral nerve sheath tumor

<sup>a</sup> Not applicable to the 91 patients with tumours located to the trunk wall.

<sup>b</sup> Overall likelihood ratio test.
